# Supplementary material for: Amino-Functionalized Titanium Based Metal-Organic Framework for Photocatalytic Hydrogen Production
Source: MDPI journal article supplement (doi:10.3390/molecules27134241), 2022-06-30
Supplement: s1 [file s1]

# **Amino-Functionalized Titanium based Metal-Organic Framework for Photocatalytic Hydrogen Production**

Niannian Hu<sup>1</sup>, Youlie Cai<sup>1</sup>, Lan Li<sup>3</sup>, Xu-Sheng Wang<sup>1,2,4\*</sup> and Junkuo Gao<sup>1,2\*</sup>

<sup>1</sup>Institute of Functional Porous Materials, School of Materials Science and Engineering, Zhejiang Sci-Tech University, Hangzhou 310018, China

<sup>2</sup>Zhejiang Provincial Innovation Center of Advanced Textile Technology, Shaoxing, 312000, China

<sup>3</sup> College of Materials Science and Engineering, China Jiliang University, Hangzhou 310018, China

<sup>4</sup> College of Chemistry and Materials Science, Jinan University, Guangzhou 510632, China

\*Correspondence: xswang@zstu.edu.cn (X. S. W.); jkgao@zstu.edu.cn (J. G.)

## 1. Chemicals.

4,4',4''-benzene-1,3,5-tribenzoic acid (BTB) (Purity 98%, Shanghai Kaishu Chemical Technology), 2,4,6-tri(4-carboxyphenylphenyl)aniline (NH<sub>2</sub>-BTB) (Purity 98% Nanchang Chouhe Pharmaceutical Technology), DMF (Purity 99.8%, Annegie Chemical Reagents), Methanol (Analysis Pure, Aladdin Chemical Reagents), Isopropyl titanate (Ti analyzes pure, TCI chemical), Chloroplatinic acid (H<sub>2</sub>PtCl<sub>6</sub>) (assay pure, Aladdin Chemical Reagents), Ethanol (analysis pure, Hangzhou Gaojing Fine Chemical), Isopropanol (analysis pure, Hangzhou Gaojing Fine Chemical), Glacial Acetic Acid (Analytical Pure, Aladdin Chemical Reagents), Acetonitrile (Analytical Pure, Aladdin Chemical Reagents), Triethanolamine (Analytical Pure, Aladdin Chemical Reagents).

## 2. Material characterization

Field emission scanning electron microscopy (SEM) (JSM-6700F, FESEM, JEOL, Japan) was used to observe the microscopic morphology of MOFs with an acceleration voltage of 3 kV. Transmission electron microscopy (TEM) image were obtained by JEM-2100. The crystal structure of MOFs was tested using a powder X-ray diffractometer (PXRD, Bruker AXS D8 Advance) with Cu target Ka radiation at a scanning range of 3° to 40° and a scanning rate of 3° min<sup>-1</sup>. The surface area and porosity of MOFs were characterized using the Specific Surface Area Analyzer (3H-2000PS). Fourier transform infrared spectra were recorded from blank KBr pellets using the Perkin Elmer FTIR SpectrumGX spectrometer. Thermogravimetric analysis (TGA) data were collected from TGA/DSC 2 thermogravimetric analyzer (Mettler-Toledo Corp. Switzerland) in N<sub>2</sub> atmosphere at a heating rate of 10 °C/min up to 800 °C. The UV-VIS absorption spectra of ZSTU-2 and NH<sub>2</sub>-ZSTU-2 were measured by Shimadzu UV-2450 spectrophotometer. Barium sulfate was used as a reference material. Using the Tauc plot method:

$$(\alpha h\nu)^2 = K(h\nu - E_g) \quad (1)$$

Here " $\alpha$ " is the absorption coefficient, " $h\nu$ " is the incident photon energy, " $K$ " is an energy independent constant, " $E_g$ " is the bandgap energy. Let's start from the Absorbance data and apply Tau's equation (1) to check its bandgap energy.

Using equation (1), we will plot:

$h\nu=1240/\text{wavelength}$  On x-axis and  $(\alpha h\nu)^2$  On Y-axis.

### 3. Synthesis of ZSTU-2

4,4',4''-benzene-1,3,5-tribenzoic acid ( $H_3BTB$ ) (90 mg, 0.205 mmol) and DMF (5 mL) was firstly added into a 25 mL Teflon-lined stainless-steel autoclave, and then 100  $\mu$ L glacial acetic acid was added dropwise. After sonication for 10 min,  $H_3BTB$  was fully dissolved to obtain a transparent solution, and then  $Ti(i-OPr)_4$  (0.04 mL, 0.128 mmol) was added dropwise, and sonication was performed for 20 min to form a white slurry. The autoclave was then heated in an oven at 190 °C for 22 h. After cooling down, the yellow powder ZSTU-2 was obtained by centrifuging and washing with DMF and methanol for several times. At last, ZSTU-2 was dried in a vacuum oven at 60 °C for 12 h to remove the residual methanol.

### 4. Refinement of $NH_2$ -ZSTU-2

Since the PXRD pattern of  $NH_2$ -ZSTU-2 are highly similar to that of ZSTU-2, the primary structure of  $NH_2$ -ZSTU-2 was obtained through installing amino group onto ZSTU-2 structure and optimized in Material Studio 8.0. Then, the Pawley refinement of the experimental PXRD was conducted by the Reflux module in the Material Studio 8.0. Crystal data and refinement details were list in the Table S1-2.

### 5. Additional figures and tables

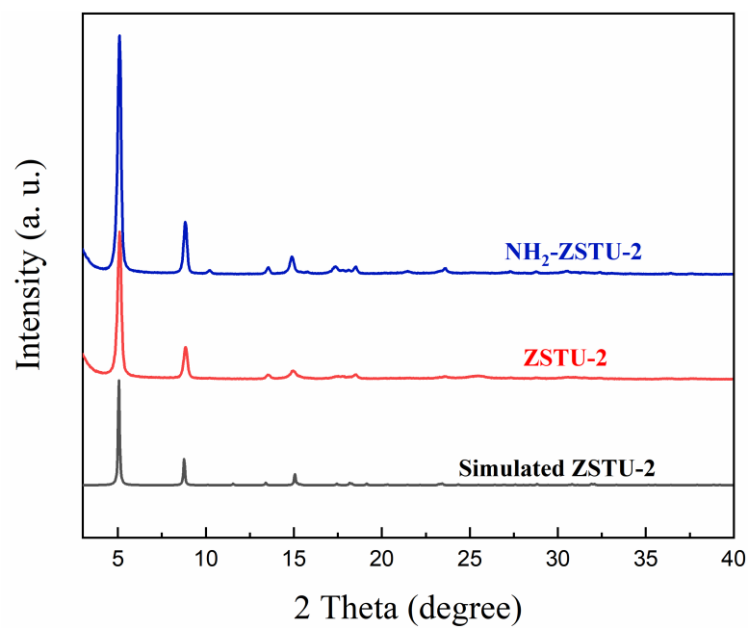

Figure S1. The PXRD patterns of the simulated ZSTU-2, as synthesized ZSTU-2, and  $\text{NH}_2\text{-ZSTU-2}$ .

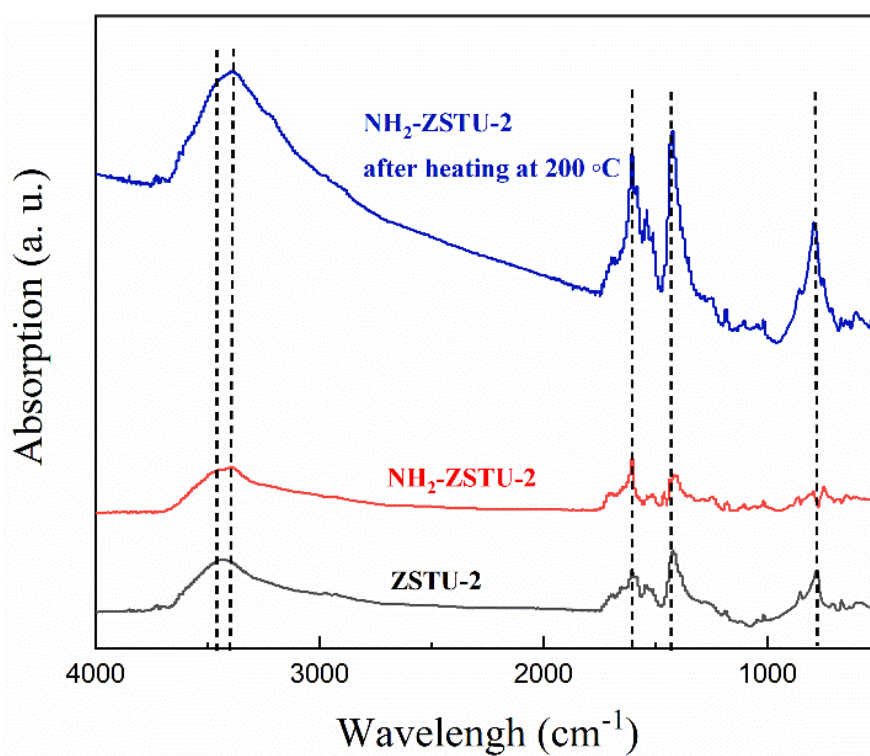

Figure S2. Infrared spectra of the ZSTU-2,  $\text{NH}_2\text{-ZSTU-2}$ , and  $\text{NH}_2\text{-ZSTU-2}$  after heating at  $200^\circ\text{C}$  under vacuum.

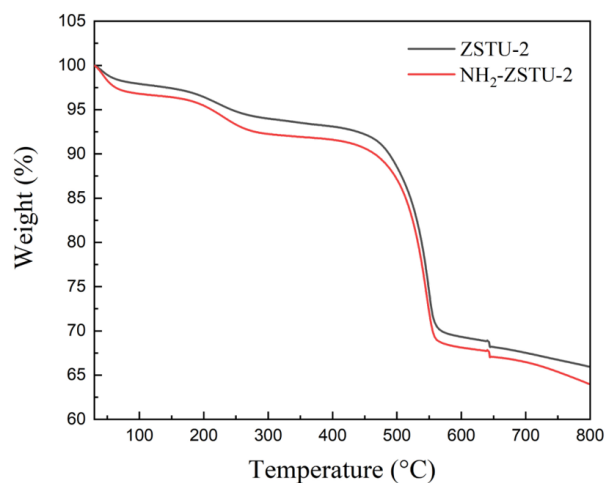

Figure S3. Thermogravimetry analysis of ZSTU-2 and NH<sub>2</sub>-ZSTU-2 under nitrogen atmosphere.

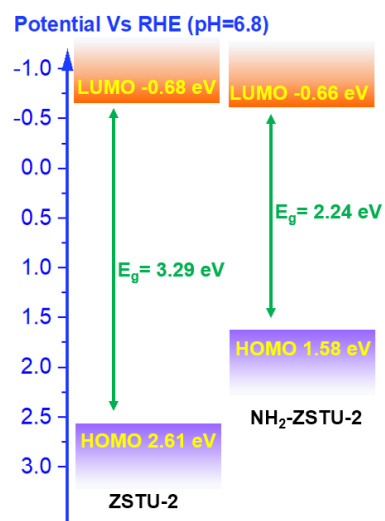

Figure S4. The energy band diagram of the ZSTU-2 and NH<sub>2</sub>-ZSTU-2.

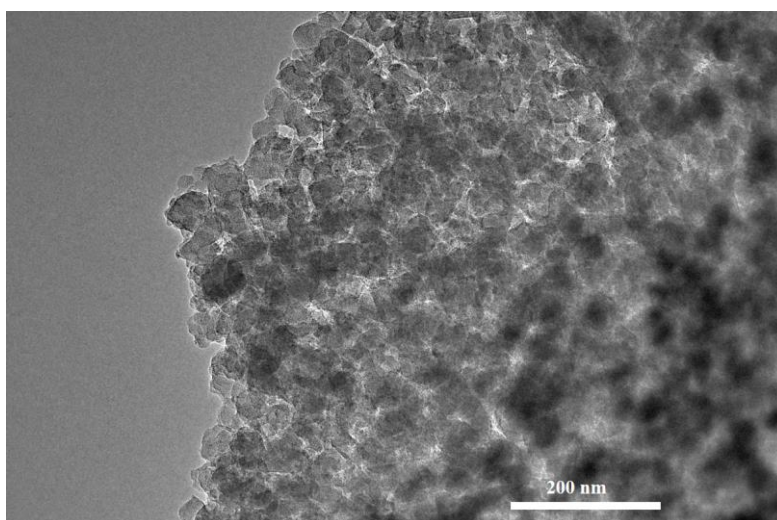

Figure S5. TEM image of Pt@NH<sub>2</sub>-ZSTU-2.

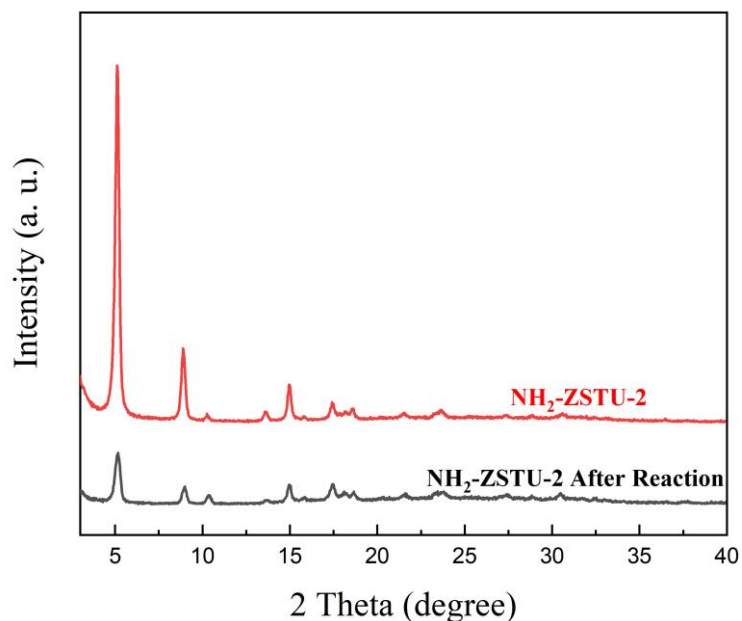

Figure S6. Powder XRD patterns of NH<sub>2</sub>-ZSTU-2 before and after three cycles of photocatalytic hydrogen production.

Table S1. Crystal data and refinement details.

|                                 |                         |
|---------------------------------|-------------------------|
| Structure name                  | NH <sub>2</sub> -ZSTU-2 |
| CCDC number                     | 2182550                 |
| Crystal system                  | orthorhombic            |
| Space group                     | Amm2                    |
| a/Å                             | 11.7987                 |
| b/Å                             | 34.6036                 |
| c/Å                             | 20.1266                 |
| $\alpha$ (°)                    | 90.000                  |
| $\beta$ (°)                     | 90.000                  |
| $\gamma$ (°)                    | 90.000                  |
| Unit cell volume/Å <sup>3</sup> | 8217.24                 |
| Z                               | 4                       |
| Temperature/K                   | 293                     |
| Wavelength/Å                    | 1.54051                 |
| $R_p$                           | 0.0720                  |
| $R_{wp}$                        | 0.0943                  |

Table S2. Fractional atomic coordinates.

| Atom name | <i>x</i> | <i>y</i> | <i>z</i> |
|-----------|----------|----------|----------|
| O1        | 0.68000  | 0.96640  | 0.81748  |
| C6        | 0.68440  | 0.90991  | 0.63282  |

|      |         |         |         |
|------|---------|---------|---------|
| C7   | 0.68351 | 0.92987 | 0.69286 |
| H6   | 0.63233 | 0.92000 | 0.59143 |
| H7A  | 0.63187 | 0.95577 | 0.69937 |
| O10  | 0.68000 | 0.60823 | 0.53888 |
| C26  | 0.68440 | 0.72950 | 0.54710 |
| C25  | 0.68351 | 0.68926 | 0.54681 |
| H26  | 0.63233 | 0.74530 | 0.58283 |
| H25  | 0.63187 | 0.67304 | 0.58212 |
| O5   | 0.68000 | 0.92765 | 0.14573 |
| C15  | 0.68440 | 0.86288 | 0.32216 |
| C16  | 0.68351 | 0.88314 | 0.26241 |
| H15A | 0.63233 | 0.83697 | 0.32782 |
| H16  | 0.63187 | 0.87346 | 0.22059 |
| O6   | 0.81828 | 0.96639 | 0.18419 |
| C19  | 0.81387 | 0.90991 | 0.36885 |
| C18  | 0.81476 | 0.92987 | 0.30881 |
| H19  | 0.86594 | 0.92000 | 0.41024 |
| H18  | 0.86640 | 0.95577 | 0.30228 |
| O9   | 0.81828 | 0.60823 | 0.46278 |
| C22  | 0.81387 | 0.72950 | 0.45456 |
| C23  | 0.81476 | 0.68926 | 0.45485 |
| H22  | 0.86594 | 0.74530 | 0.41883 |
| H23  | 0.86640 | 0.67304 | 0.41955 |
| O2   | 0.81828 | 0.92764 | 0.85594 |
| C4   | 0.81387 | 0.86288 | 0.67950 |
| C3   | 0.81476 | 0.88314 | 0.73925 |
| H4   | 0.86594 | 0.83697 | 0.67384 |
| H3A  | 0.86640 | 0.87346 | 0.78107 |
| O31  | 0.82186 | 0.54041 | 0.54279 |
| Ti3  | 0.64463 | 0.54976 | 0.55206 |
| C5   | 0.74914 | 0.87595 | 0.62509 |
| C2   | 0.74914 | 0.91677 | 0.74662 |
| C1   | 0.74914 | 0.93839 | 0.81100 |
| C8   | 0.74914 | 0.85455 | 0.56134 |
| C21  | 0.74914 | 0.75036 | 0.50041 |
| C24  | 0.74914 | 0.66874 | 0.50041 |
| C27  | 0.74914 | 0.62550 | 0.50041 |
| C10  | 0.74914 | 0.79318 | 0.50041 |
| C14  | 0.74914 | 0.87595 | 0.37657 |

|     |         |         |         |
|-----|---------|---------|---------|
| C17 | 0.74914 | 0.91677 | 0.25505 |
| C20 | 0.74914 | 0.93839 | 0.19066 |
| C12 | 0.74914 | 0.85455 | 0.44032 |
| C13 | 0.74914 | 0.87445 | 0.50041 |
| H13 | 0.74914 | 0.90602 | 0.50041 |
| C9  | 0.74914 | 0.81392 | 0.56051 |
| H9  | 0.74914 | 0.79813 | 0.60751 |
| C11 | 0.74914 | 0.81392 | 0.44115 |
| N1  | 0.75202 | 0.79185 | 0.37637 |
| H1B | 0.71311 | 0.76620 | 0.37026 |
| H1A | 0.80171 | 0.80396 | 0.34222 |
| O14 | 0.50000 | 0.57025 | 0.51064 |
| H14 | 0.50000 | 0.58553 | 0.47108 |
| O7  | 1.00000 | 0.97116 | 0.11350 |
| H7  | 1.00000 | 0.94318 | 0.11606 |
| O8  | 0.67642 | 1.00000 | 0.08516 |
| Ti2 | 0.85365 | 1.00000 | 0.10371 |
| O13 | 0.67642 | 0.54041 | 0.45887 |
| Ti4 | 0.85365 | 0.54976 | 0.44960 |
| O15 | 0.50000 | 0.53914 | 0.60329 |
| H15 | 0.50000 | 0.52643 | 0.64623 |
| O4  | 0.82186 | 1.00000 | 0.91650 |
| Ti1 | 0.64463 | 1.00000 | 0.89795 |
| O11 | 1.00000 | 0.57025 | 0.49102 |
| H11 | 1.00000 | 0.58553 | 0.53058 |
| O12 | 1.00000 | 0.53914 | 0.39837 |
| H12 | 1.00000 | 0.52643 | 0.35543 |
| O3  | 0.50000 | 0.97116 | 0.88816 |
| H3  | 0.50000 | 0.94318 | 0.88560 |
